# Supplementary material for: Elovl2-Ablation Leads to Mitochondrial Membrane Fatty Acid Remodeling and Reduced Efficiency in Mouse Liver Mitochondria
Source: Preprints.org preprint supplement (doi:10.20944/preprints202112.0267.v1), 2021-12-16
Supplement: Supplementary file 1 [file supplementary]

## Acyl chain lenght

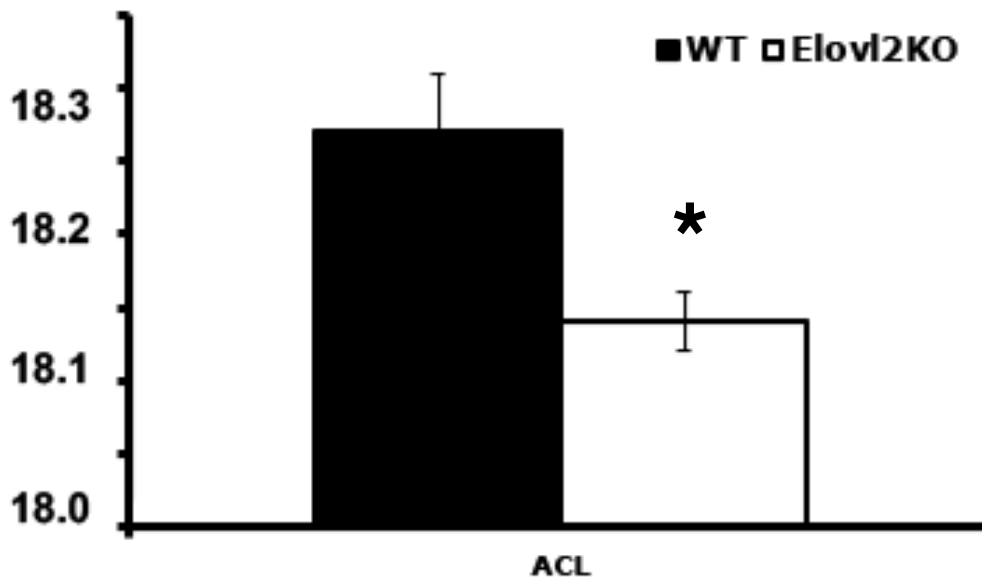

## Supplementary Figure 1

Acyl chain length (ACL) of mitochondrial fatty acids from wild-type and Elovl2 KO mice. For calculation of ACL value (number of carbon atoms), see the Materials and Methods section.

Values are means  $\pm$  SEM from 6 different mitochondrial preparation for each mouse genotype. Significant differences are shown between wild-type and Elovl2 KO mice: \*  $P < 0.05$ .

## Relative amount oxidative damage markers

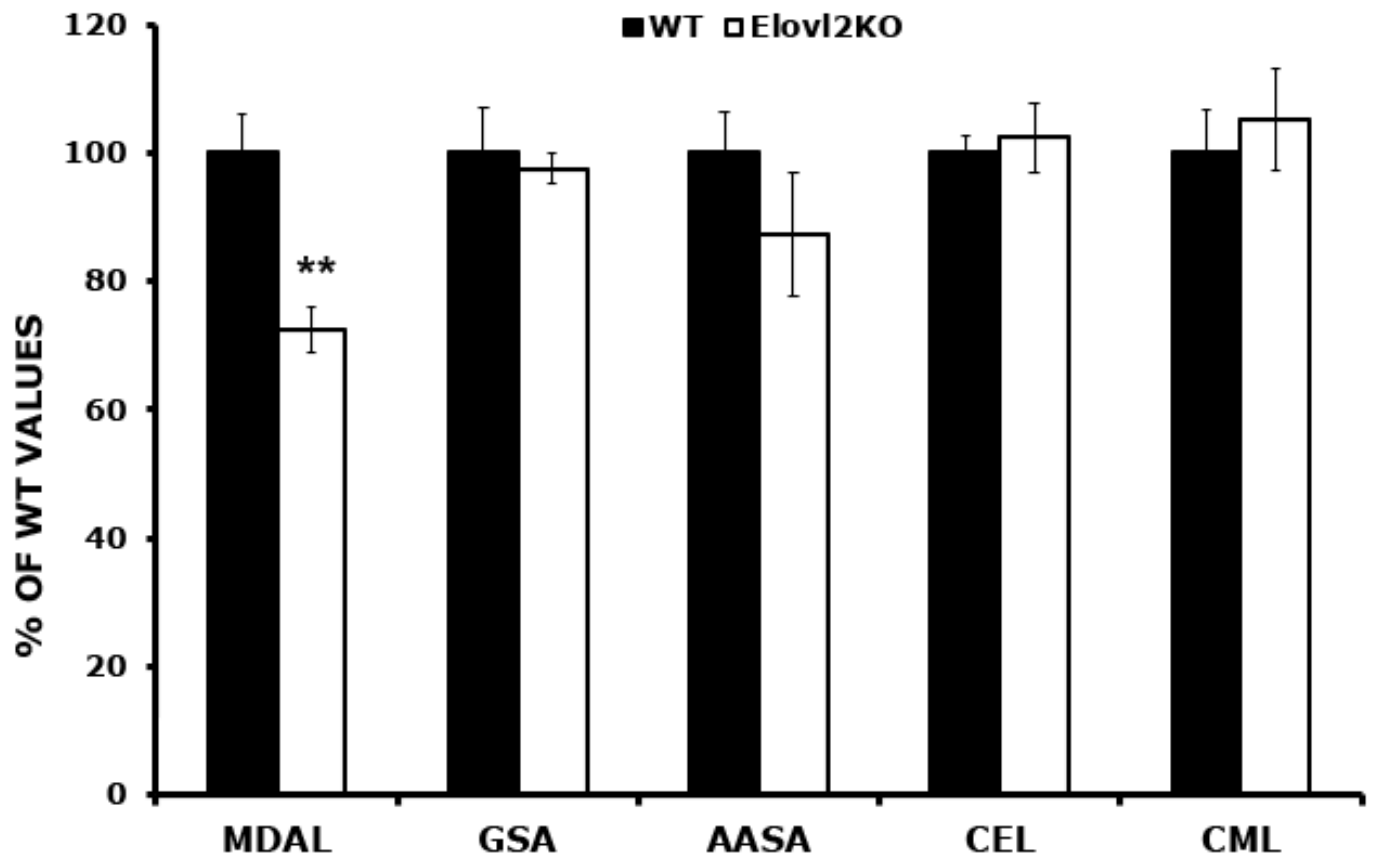

### Supplementary Figure 2

Lipoxidation (MDAL), protein oxidation (GSA, AASA), and glycoxidation (CEL, CML) indicators in liver mitochondria from WT and Elovl2 KO mice.

Values are means  $\pm$  SEM from 6 different mitochondrial preparation for each mouse genotype and expressed as a percentage of wild-type animals. Absolute values are presented in Figure 3. Significant differences are shown between wild-type and Elovl2 KO mice, \*\*  $P < 0.01$ .
